# Supplementary material for: Influence of Surface Chemistry of Fiber and Lignocellulosic Materials on Adhesion Properties with Polybutylene Succinate at Nanoscale
Source: MDPI journal article supplement (doi:10.3390/ma16062440), 2023-03-18
Supplement: s1 [file s1]

## Supplementary data

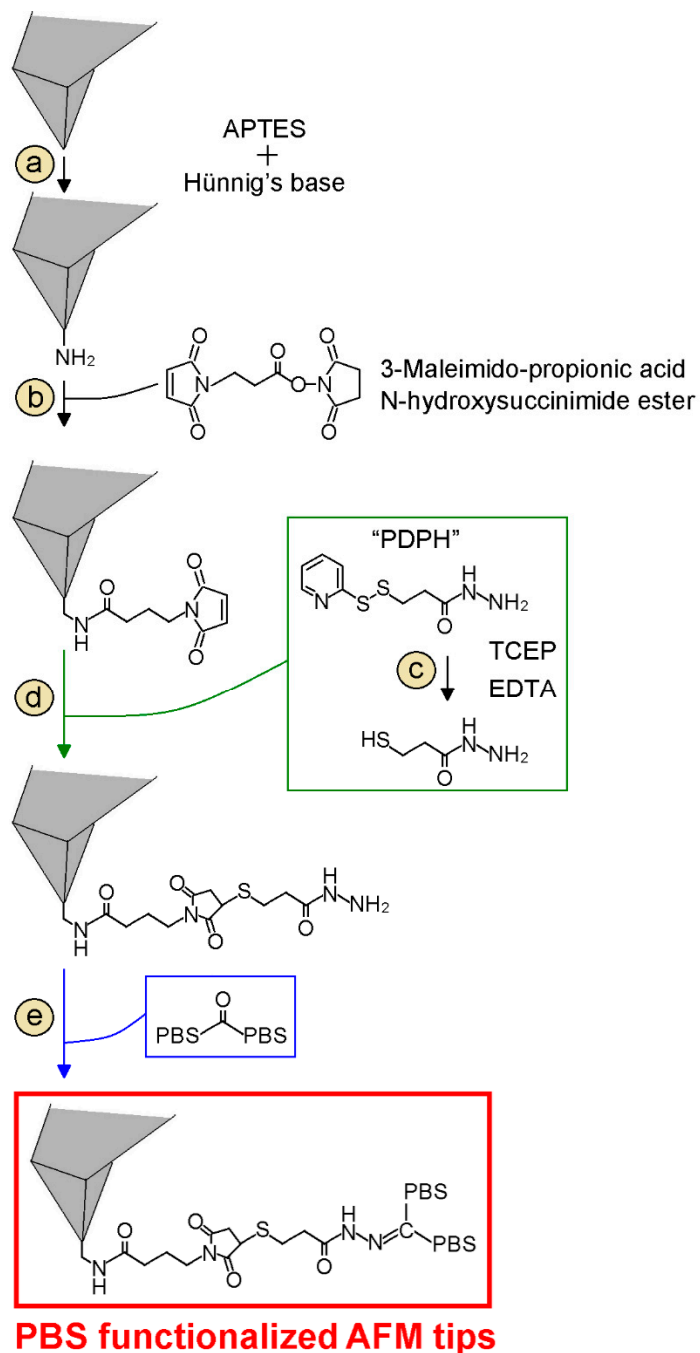

**Figure S1.** Schematic representation of the functionalization strategy followed to covalently tether PBS on AFM tips. **(a)** Aminofunctionalization procedure. **(b)** Reaction of aminated tips with the selected heterobifunctional linker to expose maleimide groups. **(c)** Activation of PDPH linker to exhibit reactive sulfhydryl groups. **(d)** These sulfhydryl groups react with the maleimide coming from the AFM tip to form thioether bonds. **(e)** Stable hydrazone bond ( $R_1-NH-N=C-R_2$ ) formation to link PBS molecules into AFM tips through their ketone moieties. AFM-FS measurements can be devoted once the AFM tips are externally coated with PBS.

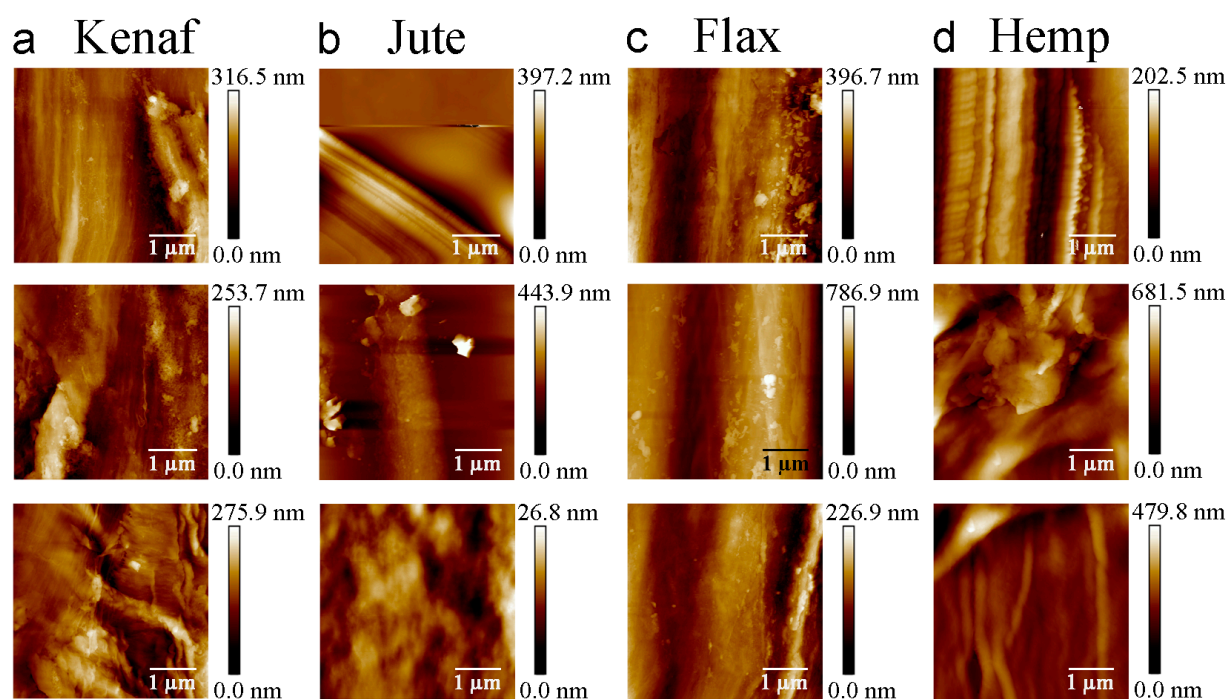

**Figure S2.** AFM topography images of (a) Kenaf, (b) Jute, (c) Flax and (d) Hemp fibers.

**Table S1.** Roughness (Rq) analysis of the plant fiber surfaces (nm).

|        | Lignified fibers |             | Hypolignified fibers |             |
|--------|------------------|-------------|----------------------|-------------|
|        | Kenaf            | Jute        | Flax                 | Hemp        |
| Area 1 | 45.1             | 47.1        | 64.8                 | 34.8        |
| Area 2 | 34.3             | 54.4        | 130.0                | 97.7        |
| Area 3 | 39.6             | 3.8         | 33.9                 | 52.1        |
| Mean   | 39.7 ± 2.7       | 35.1 ± 13.7 | 76.2 ± 24.5          | 61.5 ± 16.2 |

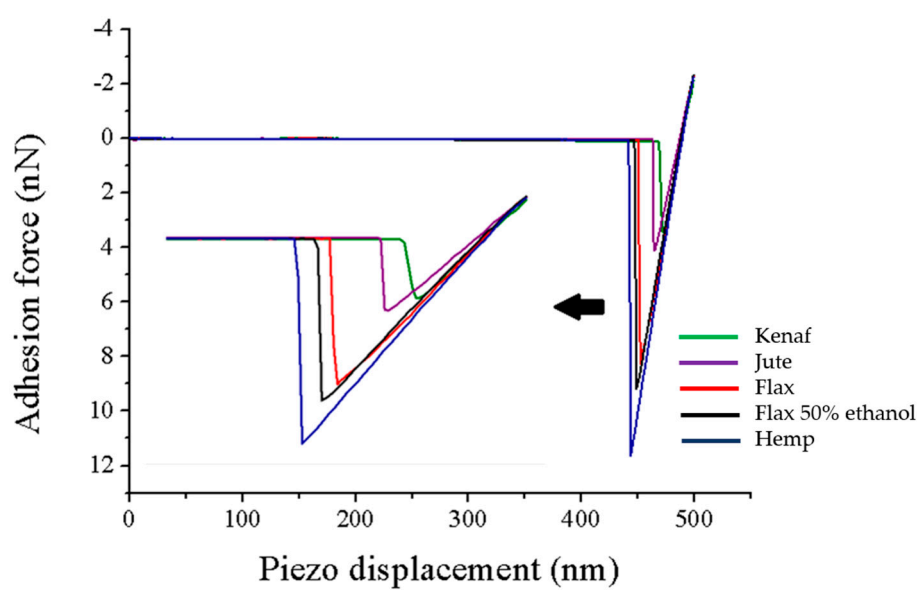

**Figure S3.** Representative force curves of the studied plant fibers. Insert: zoom of the force curves depicted by a black arrow.
